# Supplementary material for: Treatment Preferences for Pharmacological versus Psychological Interventions among Primary Care Providers in Nepal: Mixed Methods Analysis of a Pilot Cluster Randomized Controlled Trial
Source: MDPI journal article supplement (doi:10.3390/ijerph19042149), 2022-02-14
Supplement: s1 [file s1]

**Table S1.** Comparison of Depression Attitudes Questionnaire (DAQ) results between standard mhGAP training and RESHAPE

| DAQ Questions                                           | Standard mhGAP |         | RESHAPE      |         |
|---------------------------------------------------------|----------------|---------|--------------|---------|
|                                                         | F Statistic    | p-value | F Statistics | p-value |
| DAQ#1. Depression improves without medication           | 8.68           | 0.001   | 9.83         | <0.001  |
| DAQ#11. Depression is treatment by primary care workers | 2.17           | 0.092   | 4.40         | 0.005   |
| DAQ#12. Antidepressants work in primary care settings   | 1.87           | 0.049   | 9.04         | <0.001  |
| DAQ#13. Psychotherapy is deliverable by non-specialists | 4.78           | 0.003   | 11.64        | <0.001  |

**Table S2.** Comparison of mhGAP attitudes questions between mhGAP training and RESHAPE

| mhGAP Knowledge<br>Question                                           | Standard mhGAP |         | RESHAPE  |         |
|-----------------------------------------------------------------------|----------------|---------|----------|---------|
|                                                                       | $\chi^2$       | p-value | $\chi^2$ | p-value |
| Not all people with depression must be treated with antidepressants   | 7.04           | 0.071   | 17.62    | <0.001  |
| Providing counseling to people who have alcohol problems is effective | 10.01          | 0.019   | 26.201   | <0.001  |
| Antidepressants should only be given after psychosocial treatment     | 2.48           | 0.480   | 5.49     | 0.139   |
